# Supplementary material for: Integrated Epigenome Profiling of Repressive Histone Modifications, DNA Methylation and Gene Expression in Normal and Malignant Urothelial Cells
Source: PubMed Central journal article supplement (PMC3296741; doi:10.1371/journal.pone.0032750), 2012-03-07
Supplement: pone.0032750.s001.pdf [file pone.0032750.s001.pdf]

a). Enrichment at all individual TSS (n=47,746)

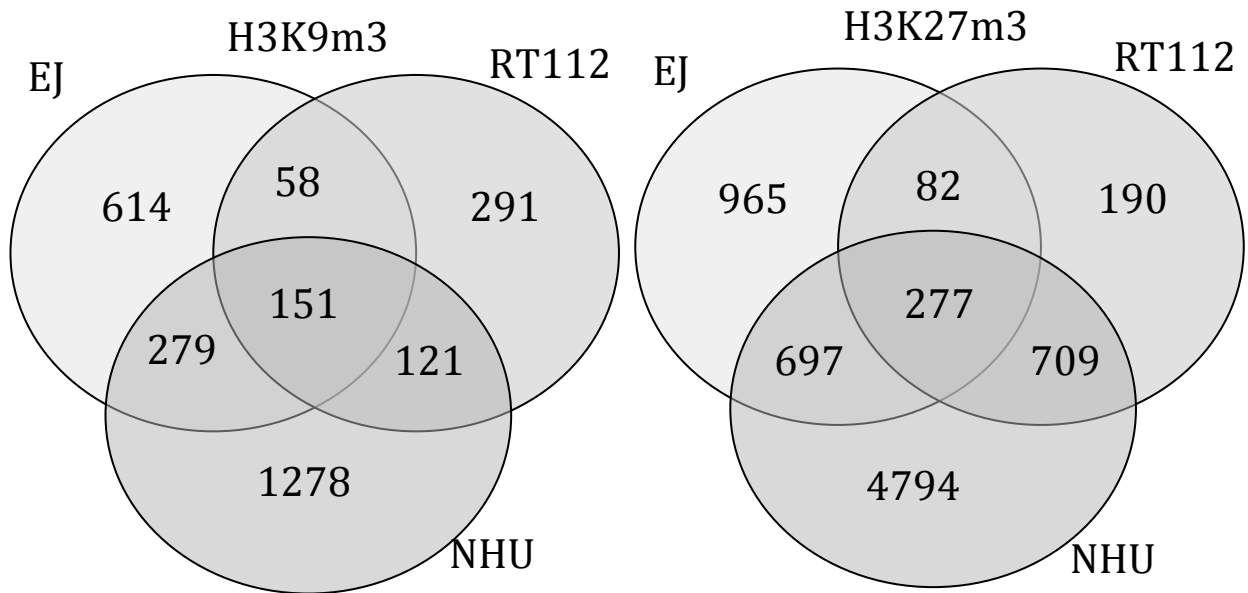

b). Enrichment of DNA at individual TSS with CpG islands (n=28,690). The percentage of total TSS is shown.

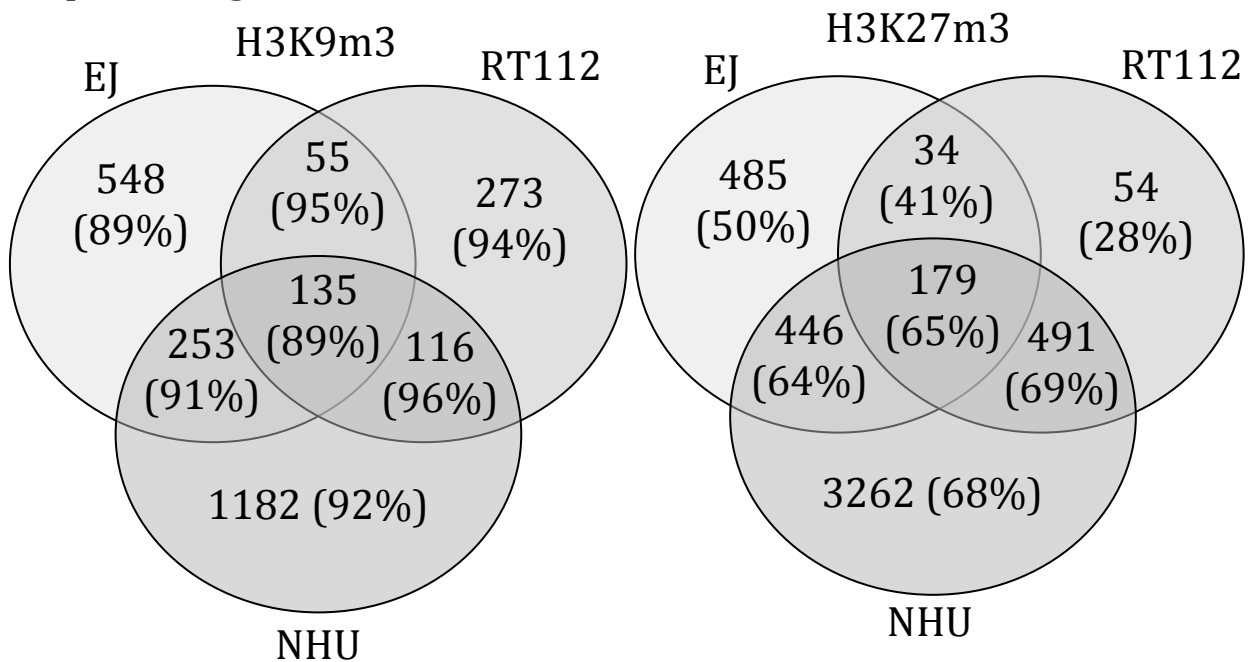

Supplementary figure 1: Histone enrichment at specific TSS
