# Supplementary material for: Integrated Epigenome Profiling of Repressive Histone Modifications, DNA Methylation and Gene Expression in Normal and Malignant Urothelial Cells
Source: PubMed Central journal article supplement (PMC3296741; doi:10.1371/journal.pone.0032750), 2012-03-07
Supplement: pone.0032750.s004.pdf [file pone.0032750.s004.pdf]

a). Cell lines analyzed in isolation

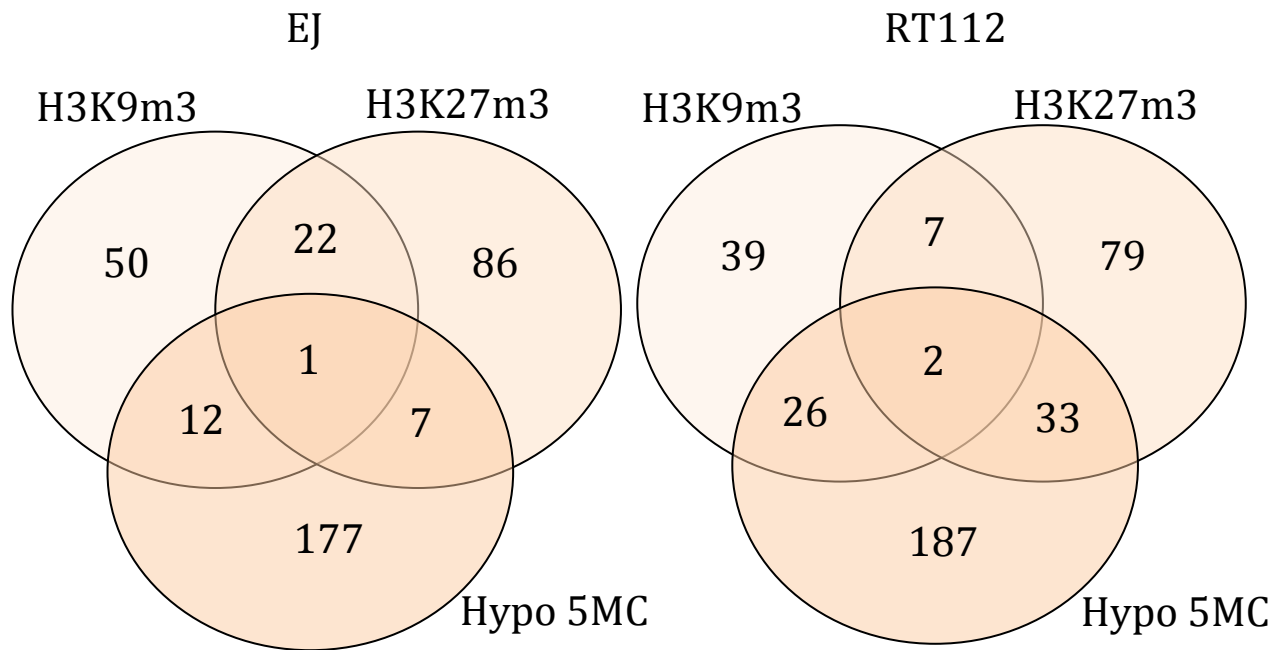

b). Genes common to both cancer cell lines

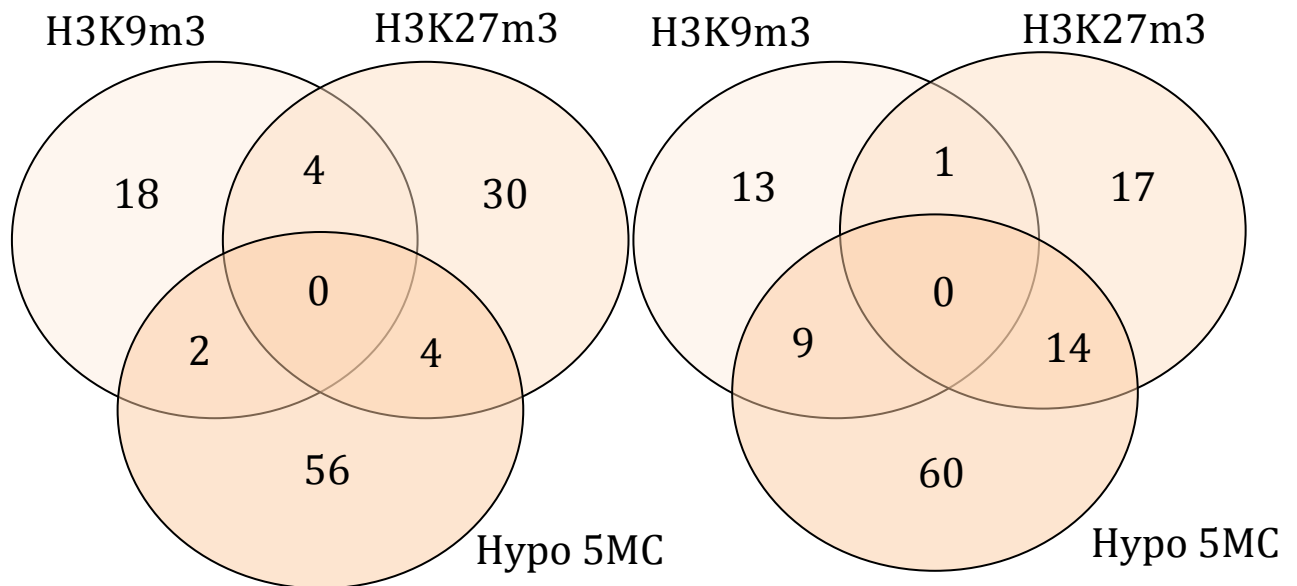

Supplementary figure 4: Epigenetic gene upregulation in malignant cells when compared to NHU
