# Supplementary material for: Integrated Epigenome Profiling of Repressive Histone Modifications, DNA Methylation and Gene Expression in Normal and Malignant Urothelial Cells
Source: PubMed Central journal article supplement (PMC3296741; doi:10.1371/journal.pone.0032750), 2012-03-07
Supplement: pone.0032750.s005.pdf [file pone.0032750.s005.pdf]

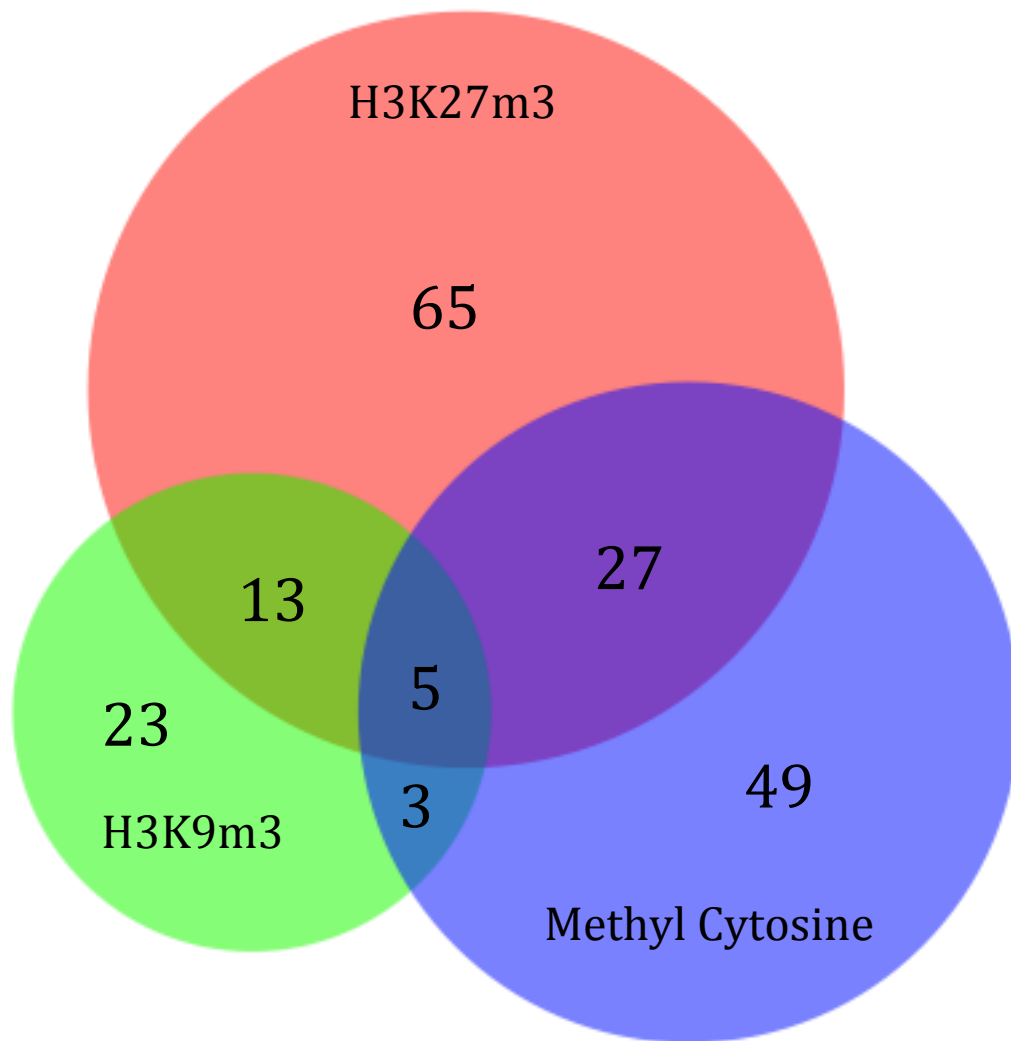

Supplementary figure 5: Functional annotation clustering of genes with epigenetic marks in EJ cells. The number of gene clusters within each part of the diagram is indicated.
