# Supplementary material for: Integrated Epigenome Profiling of Repressive Histone Modifications, DNA Methylation and Gene Expression in Normal and Malignant Urothelial Cells
Source: PubMed Central journal article supplement (PMC3296741; doi:10.1371/journal.pone.0032750), 2012-03-07
Supplement: pone.0032750.s006.pdf [file pone.0032750.s006.pdf]

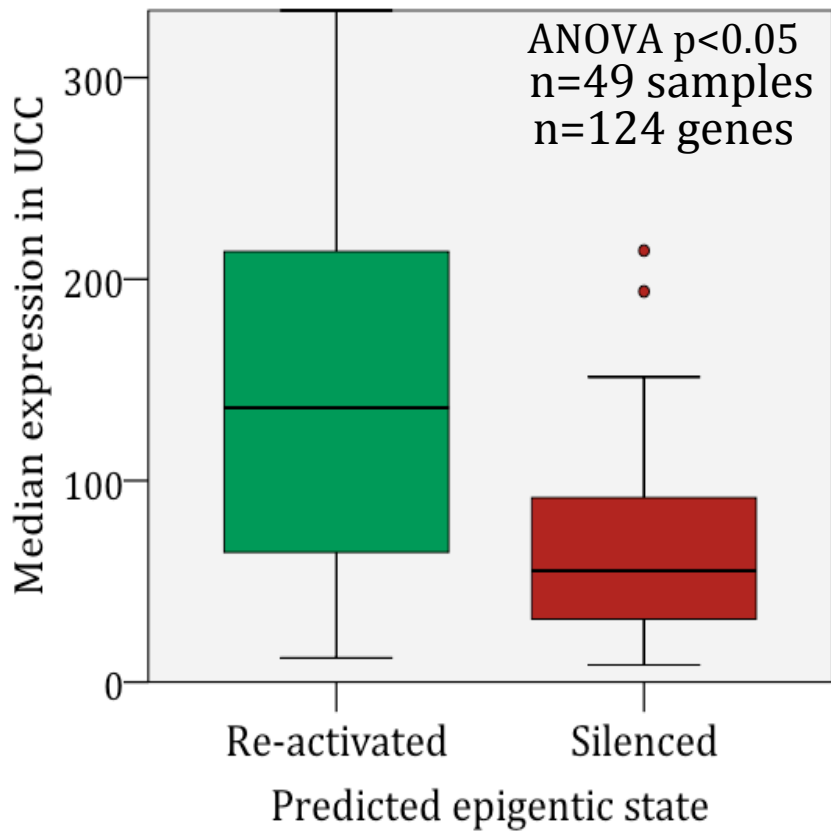

Supplementary figure 6: mRNA expression of our selected genes in 55 urothelial samples was lower in genes with repressive epigenetic marks when compared to those predicted to be re-activated.
