# Supplementary material for: Integrated Epigenome Profiling of Repressive Histone Modifications, DNA Methylation and Gene Expression in Normal and Malignant Urothelial Cells
Source: PubMed Central journal article supplement (PMC3296741; doi:10.1371/journal.pone.0032750), 2012-03-07
Supplement: pone.0032750.s007.pdf [file pone.0032750.s007.pdf]

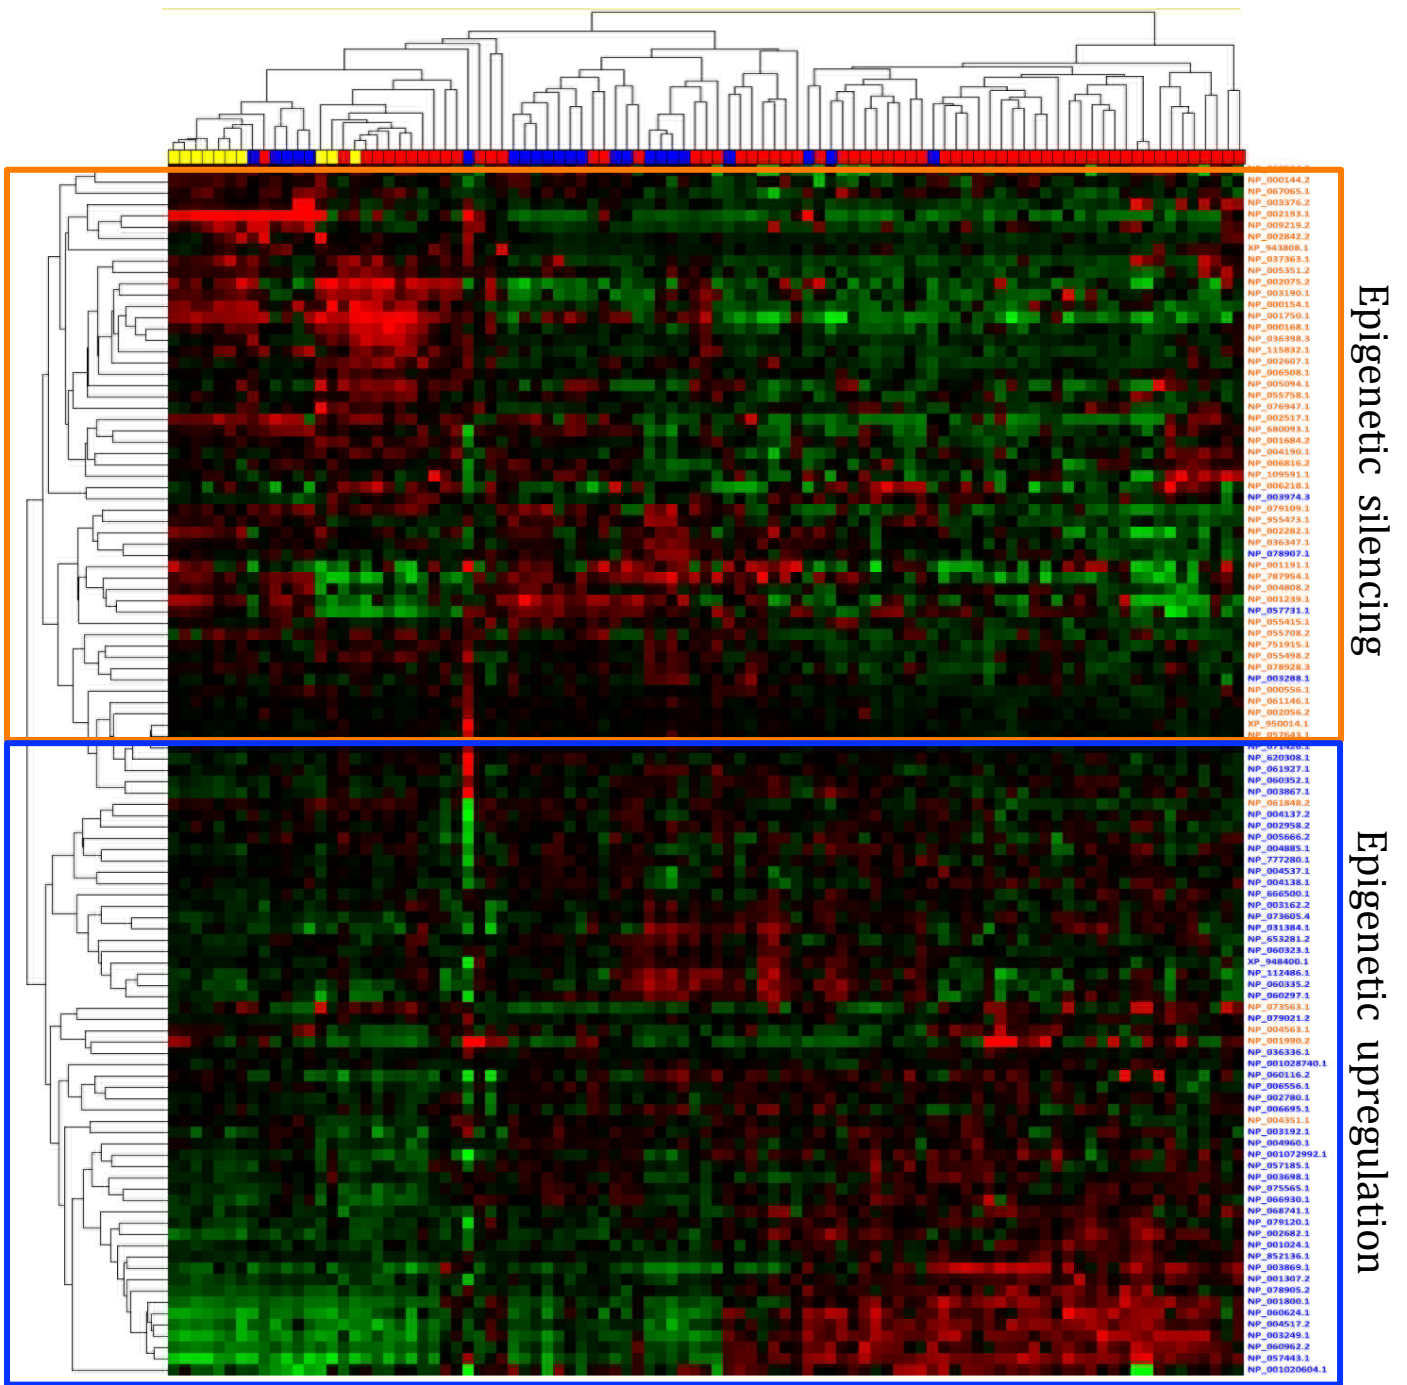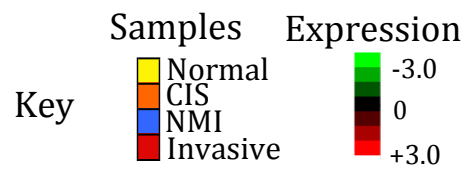

Supplementary figure 7. Unsupervised hierarchical clustering stratified malignant and normal urothelial samples according to phenotype
