# Supplementary material for: Integrated Epigenome Profiling of Repressive Histone Modifications, DNA Methylation and Gene Expression in Normal and Malignant Urothelial Cells
Source: PubMed Central journal article supplement (PMC3296741; doi:10.1371/journal.pone.0032750), 2012-03-07
Supplement: pone.0032750.s008.pdf [file pone.0032750.s008.pdf]

Supplementary Table 1. Reads per experiment obtained from massively parallel sequencing.

| Datasets      | Raw reads  | Mapped reads |        | Uniquely mapped reads |        |
|---------------|------------|--------------|--------|-----------------------|--------|
| H3K9m3 EJ     | 18,759,874 | 14,400,543   | 90.80% | 10,500,982            | 66.21% |
| H3K27m3 EJ    | 18,908,844 | 14,875,620   | 97.23% | 12,401,536            | 81.06% |
| H3K9m3 RTII2  | 11,386,627 | 9,738,322    | 96.88% | 7,977,658             | 79.37% |
| H3K27m3 RTII2 | 7,649,773  | 6,352,143    | 92.80% | 4,512,004             | 65.92% |
| H3K9m3 NHU    | 12,983,653 | 10,487,562   | 92.41% | 7,678,788             | 67.66% |
| H3K27m3 NHU   | 12,490,239 | 10,635,276   | 96.62% | 8,674,436             | 78.81% |
