# Supplementary material for: Integrated Epigenome Profiling of Repressive Histone Modifications, DNA Methylation and Gene Expression in Normal and Malignant Urothelial Cells
Source: PubMed Central journal article supplement (PMC3296741; doi:10.1371/journal.pone.0032750), 2012-03-07
Supplement: pone.0032750.s009.pdf [file pone.0032750.s009.pdf]

Supplementary table 2. Details of the combined epigenetic gene panel stratified for epigenetic mediated silencing and upregulation.

| Silencing |          |    | RNA |       |     | H3K27-3M |       |     | H3K9-3M |       |     | DNA 5mC |       |     |
|-----------|----------|----|-----|-------|-----|----------|-------|-----|---------|-------|-----|---------|-------|-----|
| Gene      | Symbol   |    | EJ  | RT112 | NHU | EJ       | RT112 | NHU | EJ      | RT112 | NHU | EJ      | RT112 | NHU |
| NM_265    | GLUL     | -1 | -1  | 1     |     | 1        | 1     |     | 1       | 1     |     |         |       |     |
| NM_24833  | ZNF671   | -1 | -1  |       |     | 1        | 1     |     | 1       | 1     |     |         |       |     |
| NM_1759   | CCND2    | -1 | -1  | 1     | 1   |          |       |     |         |       |     |         |       |     |
| NM_785    | CYP27B1  | -1 | -1  | 1     | 1   |          |       |     |         |       |     |         |       |     |
| NM_1999   | FBN2     | -1 | -1  |       |     | 1        | 1     |     |         |       |     | 1       | 1     |     |
| NM_13231  | FLRT2    | -1 | -1  | 1     | 1   |          |       |     | 1       | 1     |     |         |       |     |
| NM_15478  | L3MBTL1  | -1 | -1  | 1     | 1   |          |       |     |         |       |     | 1       |       |     |
| NM_633    | LIPG     | -1 | -1  | 1     | 1   |          |       |     | 1       | 1     |     |         |       |     |
| NM_2462   | MX1      | -1 | -1  | 1     | 1   |          |       |     | 1       | 1     |     |         |       |     |
| NM_2589   | PCDH7    | -1 | -1  | 1     | 1   |          |       |     | 1       | 1     |     |         |       |     |
| NM_1693   | ATP6V1B2 | -1 | -1  | 1     | 1   |          |       |     |         |       |     | 1       | 1     |     |
| NM_1814   | BGL11A   | -1 | -1  | 1     | 1   |          |       |     | 1       | 1     |     |         |       |     |
| NM_16229  | CYB5R2   | -1 | -1  | 1     | 1   |          |       |     | 1       | 1     |     |         |       |     |
| NM_64     | DCTN2    | -1 | -1  | 1     | 1   |          |       |     |         |       |     | 1       | 1     |     |
| NM_146    | EHD3     | -1 | -1  | 1     | 1   |          |       |     | 1       | 1     |     |         |       |     |
| NM_22726  | ELOVL4   | -1 | -1  | 1     | 1   |          |       |     | 1       | 1     |     |         |       |     |
| NM_4265   | FADS2    | -1 | -1  | 1     | 1   |          |       |     |         |       |     | 1       | 1     |     |
| NM_14164  | FXD5     | -1 | -1  |       |     |          |       | 1   |         |       |     | 1       | 1     |     |
| NM_153    | GALC     | -1 | -1  | 1     | 1   |          |       |     | 1       | 1     |     |         |       |     |
| NM_163    | GHR      | -1 | -1  | 1     | 1   |          |       |     |         |       |     | 1       | 1     |     |
| NM_1894   | GSPT2    | -1 | -1  | 1     | 1   |          |       |     | 1       | 1     |     |         |       |     |
| NM_5328   | HAS2     | -1 | -1  | 1     | 1   |          |       |     | 1       | 1     |     |         |       |     |
| NM_565    | IL6R     | -1 | -1  | 1     | 1   |          |       |     |         |       |     | 1       | 1     |     |
| NM_222    | ISL1     | -1 | -1  | 1     | 1   |          |       |     | 1       | 1     |     |         |       |     |
| NM_2291   | LAMB1    | -1 | -1  | 1     | 1   |          |       | 1   | 1       |       |     |         |       |     |
| NM_3915   | LBH      | -1 | -1  | 1     | 1   |          |       |     | 1       | 1     |     |         |       |     |
| NM_13437  | LRP12    | -1 | -1  | 1     | 1   |          |       |     | 1       | 1     |     |         |       |     |
| NM_24652  | LRRK1    | -1 | -1  | 1     | 1   |          |       |     | 1       | 1     |     |         |       |     |
| NM_536    | MAF      | -1 | -1  | 1     | 1   |          |       |     | 1       | 1     |     |         |       |     |
| NM_2442   | METRN    | -1 | -1  | 1     | 1   |          |       |     | 1       | 1     |     |         |       |     |
| NM_17459  | MFBP2    | -1 | -1  | 1     | 1   |          |       |     | 1       | 1     |     |         |       |     |
| NM_21242  | MID1P1   | -1 | -1  | 1     | 1   |          |       |     | 1       | 1     |     |         |       |     |
| NM_2526   | NTSE     | -1 | -1  | 1     | 1   |          |       |     | 1       | 1     |     |         |       |     |
| NM_4199   | P4HA2    | -1 | -1  | 1     | 1   |          |       |     | 1       | 1     |     |         |       |     |
| NM_445    | PLEC     | -1 | -1  | 1     | 1   |          |       |     | 1       | 1     |     |         |       |     |
| NM_6227   | PLTP     | -1 | -1  | 1     | 1   |          |       |     | 1       | 1     |     |         |       |     |
| NM_6822   | RAB4B    | -1 | -1  | 1     | 1   |          |       |     | 1       | 1     |     |         |       |     |
| NM_14     | S1PK1    | -1 | -1  | 1     | 1   |          |       |     | 1       | 1     |     |         |       |     |
| NM_24628  | SLC12A8  | -1 | -1  | 1     | 1   |          |       |     | 1       | 1     |     |         |       |     |
| NM_6517   | SLC16A2  | -1 | -1  | 1     | 1   |          |       |     | 1       | 1     |     |         |       |     |
| NM_18676  | THSD1    | -1 | -1  | 1     | 1   |          |       |     |         |       |     | 1       | 1     |     |
| NM_1812   | ZNF334   | -1 | -1  | 1     | 1   |          |       | 1   |         |       |     | 1       | 1     |     |
| NM_3816   | ADAM9    | -1 | -1  |       |     |          |       |     | 1       | 1     |     |         |       |     |
| NM_487    | ARSA     | -1 | -1  |       |     |          |       | 1   | 1       |       |     |         |       |     |
| NM_4874   | BAG4     | -1 | -1  |       |     |          |       |     | 1       | 1     |     |         |       |     |
| NM_5881   | BCKDK    | -1 | -1  |       |     |          |       |     | 1       | 1     |     |         |       |     |
| NM_12     | BMP2     | -1 | -1  | 1     | 1   |          |       |     | 1       | 1     |     |         |       |     |
| NM_153218 | C13orf31 | -1 | -1  | 1     | 1   |          |       |     |         |       |     | 1       | 1     |     |
| NM_436    | CDH1     | -1 | -1  |       |     |          |       |     | 1       | 1     |     |         |       |     |
| NM_6825   | CKAP4    | -1 | -1  |       |     |          |       |     | 1       | 1     |     |         |       |     |
| NM_198    | CTS8     | -1 | -1  |       |     |          |       |     | 1       | 1     |     |         |       |     |
| NM_12266  | DNABJ5   | -1 | -1  | 1     | 1   |          |       |     |         |       |     | 1       | 1     |     |
| NM_17434  | DUOX1    | -1 | -1  |       |     |          |       |     | 1       | 1     |     |         |       |     |
| NM_24712  | ELMO3    | -1 | -1  |       |     |          |       |     | 1       | 1     |     |         |       |     |
| NM_1248   | ENTPD3   | -1 | -1  | 1     | 1   |          |       |     |         |       |     | 1       | 1     |     |
| NM_22749  | FAM16B2  | -1 | -1  |       |     |          |       |     | 1       | 1     |     |         |       |     |
| NM_513    | FEZ1     | -1 | -1  | 1     | 1   |          |       |     |         |       |     | 1       | 1     |     |
| NM_635    | FST      | -1 | -1  | 1     | 1   |          |       |     |         |       |     | 1       | 1     |     |
| NM_284    | GPX3     | -1 | -1  |       |     |          |       |     | 1       | 1     |     |         |       |     |
| NM_177    | GSN      | -1 | -1  | 1     | 1   |          |       |     | 1       | 1     |     |         |       |     |
| NM_853    | GSTT1    | -1 | -1  |       |     |          |       |     | 1       | 1     |     |         |       |     |
| NM_585    | IL15     | -1 | -1  |       |     |          |       |     | 1       | 1     |     |         |       |     |
| NM_418    | IL4R     | -1 | -1  |       |     |          |       | 1   | 1       |       |     |         |       |     |
| NM_5569   | LIMK2    | -1 | -1  |       |     |          |       | 1   | 1       |       |     |         |       |     |
| NM_2318   | LOXL2    | -1 | -1  |       |     |          |       |     | 1       | 1     |     |         |       |     |
| NM_61     | MANF     | -1 | -1  |       |     |          |       |     | 1       | 1     |     |         |       |     |
| NM_12215  | MGEA5    | -1 | -1  |       |     |          |       | 1   | 1       |       |     |         |       |     |
| NM_7287   | MME      | -1 | -1  | 1     | 1   |          |       |     |         |       |     | 1       | 1     |     |
| NM_14893  | NLGN4Y   | -1 | -1  |       |     |          |       |     | 1       | 1     |     |         |       |     |
| NM_2581   | NYNRIN   | -1 | -1  | 1     | 1   |          |       |     |         |       |     | 1       | 1     |     |
| NM_2616   | PER1     | -1 | -1  |       |     |          |       | 1   | 1       |       |     |         |       |     |
| NM_16559  | PEX5L    | -1 | -1  |       |     |          |       |     | 1       | 1     |     |         |       |     |
| NM_4572   | PKP2     | -1 | -1  | 1     | 1   |          |       |     |         |       |     | 1       | 1     |     |
| NM_5167   | PPM1J    | -1 | -1  | 1     | 1   |          |       |     |         |       |     | 1       | 1     |     |
| NM_2851   | PTPRZ1   | -1 | -1  | 1     | 1   |          |       |     |         |       |     | 1       | 1     |     |
| NM_16321  | RHCG     | -1 | -1  |       |     |          |       |     | 1       | 1     |     |         |       |     |
| NM_3666   | SERPINB1 | -1 | -1  | 1     | 1   |          |       |     |         |       |     | 1       | 1     |     |
| NM_18418  | SPATA7   | -1 | -1  | 1     | 1   |          |       |     |         |       |     | 1       | 1     |     |
| NM_7315   | STAT1    | -1 | -1  |       |     |          |       |     | 1       | 1     |     |         |       |     |
| NM_3199   | TCF4     | -1 | -1  | 1     | 1   |          |       |     |         |       |     | 1       | 1     |     |
| NM_18975  | TERF2IP  | -1 | -1  |       |     |          |       |     | 1       | 1     |     |         |       |     |
| NM_3236   | TGFA     | -1 | -1  | 1     | 1   |          |       |     |         |       |     | 1       | 1     |     |
| NM_4817   | TJP2     | -1 | -1  |       |     |          |       |     | 1       | 1     |     |         |       |     |
| NM_14683  | ULK2     | -1 | -1  |       |     |          |       |     | 1       | 1     |     |         |       |     |
| NM_376    | VDR      | -1 | -1  | 1     | 1   |          |       |     |         |       |     | 1       | 1     |     |
| NM_13245  | VPS4A    | -1 | -1  |       |     |          |       |     | 1       | 1     |     |         |       |     |
| NM_3385   | VSNL1    | -1 | -1  | 1     | 1   |          |       |     |         |       |     | 1       | 1     |     |
| NM_14943  | ZHX2     | -1 | -1  | 1     | 1   |          |       |     |         |       |     | 1       | 1     |     |

Total of changes (%)

22% 19%

9% 7%

20% 23%

| Upregulation |          |   | RNA |       |     | H3K27-3M |       |     | H3K9-3M |       |     | DNA 5mC |       |     |
|--------------|----------|---|-----|-------|-----|----------|-------|-----|---------|-------|-----|---------|-------|-----|
| Gene         | Symbol   |   | EJ  | RT112 | NHU | EJ       | RT112 | NHU | EJ      | RT112 | NHU | EJ      | RT112 | NHU |
| NM_14171     | CRIPT    | 1 | 1   | 1     | 1   |          |       |     | 1       | 1     |     |         |       |     |
| NM_7358      | MTF2     | 1 | 1   | 1     | 1   |          |       |     |         |       |     | 1       | 1     |     |
| NM_1613      | SAR1B    | 1 | 1   | 1     | 1   |          |       |     |         |       |     | 1       | 1     |     |
| NM_2186      | ACN9     | 1 | 1   | 1     | 1   |          |       |     |         |       |     | 1       | 1     |     |
| NM_17812     | CHCHD3   | 1 | 1   | 1     | 1   |          |       |     |         |       |     | 1       | 1     |     |
| NM_1316      | CSEIL    | 1 | 1   | 1     | 1   |          |       |     |         |       |     | 1       | 1     |     |
| NM_2548      | DBI      | 1 | 1   | 1     | 1   |          |       |     |         |       |     | 1       | 1     |     |
| NM_16216     | DBRI     | 1 | 1   | 1     | 1   |          |       |     |         |       |     | 1       | 1     |     |
| NM_584       | DDX39A   | 1 | 1   | 1     | 1   |          |       |     |         |       |     | 1       | 1     |     |
| NM_5675      | DGCR6    | 1 | 1   | 1     | 1   |          |       |     |         |       |     | 1       | 1     |     |
| NM_14597     | DNTTIP2  | 1 | 1   | 1     | 1   |          |       |     |         |       |     | 1       | 1     |     |
| NM_4147      | DRG1     | 1 | 1   | 1     | 1   |          |       |     |         |       |     | 1       | 1     |     |
| NM_1954      | FAM35A   | 1 | 1   | 1     | 1   |          |       |     |         |       |     | 1       | 1     |     |
| NM_6547      | IGF2BP3  | 1 | 1   | 1     | 1   |          |       |     |         |       |     | 1       | 1     |     |
| NM_17768     | LRRC4    | 1 | 1   | 1     | 1   |          |       |     |         |       |     | 1       | 1     |     |
| NM_18353     | MIS18BP1 | 1 | 1   | 1     | 1   |          |       |     |         |       |     | 1       | 1     |     |
| NM_4927      | MIR49    | 1 | 1   | 1     | 1   |          |       |     |         |       |     | 1       | 1     |     |
| NM_2117      | MRPS12   | 1 | 1   | 1     | 1   |          |       |     |         |       |     | 1       | 1     |     |
| NM_2519      | MYO19    | 1 | 1   | 1     | 1   |          |       |     |         |       |     | 1       | 1     |     |
| NM_4546      | NDUFB2   | 1 | 1   | 1     | 1   |          |       |     |         |       |     | 1       | 1     |     |
| NM_4146      | NDUFB7   | 1 | 1   | 1     | 1   |          |       |     |         |       |     | 1       | 1     |     |
| NM_1823      | NUP133   | 1 | 1   | 1     | 1   |          |       |     |         |       |     | 1       | 1     |     |
| NM_18492     | PPK      | 1 | 1   | 1     | 1   |          |       |     |         |       |     | 1       | 1     |     |
| NM_2691      | POLR1D   | 1 | 1   | 1     | 1   |          |       |     |         |       |     | 1       | 1     |     |
| NM_17917     | PPP2R3C  | 1 | 1   | 1     | 1   |          |       |     |         |       |     | 1       | 1     |     |
| NM_3129      | QTRT1    | 1 | 1   | 1     | 1   |          |       |     |         |       |     | 1       | 1     |     |
| NM_133       | RRM1     | 1 | 1   | 1     | 1   |          |       |     |         |       |     | 1       | 1     |     |
| NM_17827     | SARS2    | 1 | 1   | 1     | 1   |          |       |     |         |       |     | 1       | 1     |     |
| NM_3983      | SLC7A6   | 1 | 1   | 1     | 1   |          |       |     |         |       |     | 1       | 1     |     |
| NM_3258      | TKI      | 1 | 1   | 1     | 1   |          |       |     |         |       |     | 1       | 1     |     |
| NM_2091      | TFR1     | 1 | 1   | 1     | 1   |          |       |     |         |       |     | 1       | 1     |     |
| NM_17917     | PPP2R3C  | 1 | 1   | 1     | 1   |          |       |     |         |       |     | 1       | 1     |     |
| NM_1634      | AMD1     | 1 | 1   | 1     | 1   |          |       |     |         |       |     | 1       | 1     |     |
| NM_1812      | ARMC1    | 1 | 1   | 1     | 1   |          |       |     |         |       |     | 1       | 1     |     |
| NM_18154     | ASF1B    | 1 | 1   | 1     | 1   |          |       |     |         |       |     | 1       | 1     |     |
| NM_24857     | ATAD5    | 1 | 1   | 1     | 1   |          |       |     |         |       |     | 1       | 1     |     |
| NM_71        | ATP5I    | 1 | 1   | 1     | 1   |          |       |     |         |       |     | 1       | 1     |     |
| NM_15878     | AZIN1    | 1 | 1   | 1     | 1   |          |       |     |         |       |     | 1       | 1     |     |
| NM_18963     | BRWD1    | 1 | 1   | 1     | 1   |          |       |     |         |       |     | 1       | 1     |     |
| NM_24631     | C11orf61 | 1 | 1   | 1     | 1   |          |       |     |         |       |     | 1       | 1     |     |
| NM_4894      | C14orf2  | 1 | 1   | 1     | 1   |          |       |     |         |       |     | 1       | 1     |     |
| NM_144597    | C15orf4  | 1 | 1   | 1     | 1   |          |       |     |         |       |     | 1       | 1     |     |
| NM_2377      | C1orf163 | 1 | 1   | 1     | 1   |          |       |     |         |       |     | 1       | 1     |     |
| NM_1884      | C2orf24  | 1 | 1   | 1     | 1   |          |       |     |         |       |     | 1       | 1     |     |
| NM_16647     | C6orf55  | 1 | 1   | 1     | 1   |          |       |     |         |       |     | 1       | 1     |     |
| NM_189       | CENPA    | 1 | 1   | 1     | 1   |          |       |     |         |       |     | 1       | 1     |     |
