# Supplementary material for: Integrated Epigenome Profiling of Repressive Histone Modifications, DNA Methylation and Gene Expression in Normal and Malignant Urothelial Cells
Source: PubMed Central journal article supplement (PMC3296741; doi:10.1371/journal.pone.0032750), 2012-03-07
Supplement: pone.0032750.s010.pdf [file pone.0032750.s010.pdf]

Supplementary table 3. Gene ontology analysis for each epigenetic mark.

| H3K27-3M only         | H3K27-3M and H3K9-3M | H3K27-3M and 5mC | H3K27-3M and H3K9-3M and 5mC | H3K9-3M only           | H3K9-3M and 5mC | 5mC only                 |
|-----------------------|----------------------|------------------|------------------------------|------------------------|-----------------|--------------------------|
| GO:0000280            | GO:0001932           | GO:0005525       | GO:0032559                   | GO:0007584             | GO:0016310      | GO:0042542               |
| GO:0007067            | GO:0032555           | GO:0032561       | GO:0030554                   | GO:0031667             | GO:0006793      | GO:0000302               |
| GO:0000087            | GO:0032553           | GO:0019001       | GO:0001883                   | GO:0009991             | GO:0006796      | GO:0006979               |
| GO:0048285            | GO:0017076           | GO:0032270       | GO:0001882                   | Serine Thr. pr kinase  |                 | GO:0010035               |
| GO:0000279            | GO:0042325           | GO:0051247       | Zinc Finger R C2H2           | ID: IPR008271          |                 | GO:0070013               |
| Fibronectin, type III | GO:0019220           | GO:0009725       |                              | ID: IPR017442          |                 | GO:0043233               |
| ID: IPR003961         | GO:0051174           | GO:0009719       |                              | Protein Kinase         |                 | GO:0031974               |
| ID: SM00060           | GO:0045860           | GO:0045893       |                              | GO:0004674             |                 | ID: ribosomal protein    |
| GO:0045892            | GO:0033674           | GO:0051254       |                              | ID: IPR017441          |                 | GO:0003735               |
| GO:0051253            | GO:0051347           | GO:0045941       |                              | ID: IPR000719          |                 | ID: ribonucleoprotein    |
| GO:0016481            | GO:0045859           | GO:0010628       |                              | GO:0004672             |                 | GO:0032268               |
| GO:0045934            | GO:0043549           | GO:0045935       |                              | GO:0006468             |                 | GO:0005643               |
| GO:0051172            | GO:0051338           | GO:0051173       |                              | GO:0044427             |                 | GO:0046930               |
| GO:0001934            |                      | GO:0010557       |                              | GO:0005694             |                 | GO:0005635               |
| GO:0042327            |                      | GO:0031328       |                              | GO:0043228             |                 | ID: mitochon             |
| GO:0010562            |                      | GO:0009891       |                              | GO:0043232             |                 | GO:0005743               |
| GO:0045937            |                      | GO:0055080       |                              | GO:0005887             |                 | GO:0019866               |
| GO:0031401            |                      | GO:0050801       |                              | GO:0031226             |                 | calcium-binding region:1 |
| GO:0031399            |                      | ATP Binding      |                              | Extracellular location |                 | domain:EF-hand 2         |
| nucleotide-binding    |                      | GO:0005524       |                              | ID: transcription      |                 | domain:EF-hand 1         |
| GO:0051494            |                      | GO:0042981       |                              | GO:0045449             |                 | GO:0009150               |
| GO:0010639            |                      | GO:0043067       |                              | ID: DNA binding        |                 | GO:0009259               |
| GO:0051493            |                      | GO:0010941       |                              | GO:0003677             |                 | GO:0006164               |
| GO:0051129            |                      | ID: IPR015880    |                              |                        |                 | GO:0006163               |
| GO:0031497            |                      | ID: SM00355      |                              |                        |                 | GO:0048660               |
| GO:0034728            |                      | ID: IPR013087    |                              |                        |                 | GO:0008284               |
| GO:0006333            |                      | GO:0030163       |                              |                        |                 | GO:0042127               |
| GO:0032103            |                      |                  |                              |                        |                 | GO:0034097               |
| GO:0032101            |                      |                  |                              |                        |                 | GO:0007243               |
| GO:0048584            |                      |                  |                              |                        |                 | GO:0007409               |
| GO:0030335            |                      |                  |                              |                        |                 | GO:0048667               |
| GO:0040017            |                      |                  |                              |                        |                 | GO:0048812               |
| GO:0051272            |                      |                  |                              |                        |                 | GO:0000904               |
| GO:0030334            |                      |                  |                              |                        |                 | GO:0048858               |
| GO:0040012            |                      |                  |                              |                        |                 | GO:0032990               |
| GO:0051270            |                      |                  |                              |                        |                 | GO:0000902               |
| ID: IPR000504         |                      |                  |                              |                        |                 | ID: protein transport    |
| ID: IPR012677         |                      |                  |                              |                        |                 | GO:0015031               |
| ID: SM00360           |                      |                  |                              |                        |                 | GO:0045184               |
| ID: rna-binding       |                      |                  |                              |                        |                 | GO:0045944               |
| GO:0003723            |                      |                  |                              |                        |                 | GO:0004175               |
| GO:0048545            |                      |                  |                              |                        |                 | ID: Protease             |
| GO:0050767            |                      |                  |                              |                        |                 | GO:0070011               |
| GO:0051960            |                      |                  |                              |                        |                 | GO:0008233               |
| GO:0060284            |                      |                  |                              |                        |                 | GO:0044265               |
| GO:0009165            |                      |                  |                              |                        |                 | GO:0009057               |
| GO:0034654            |                      |                  |                              |                        |                 | GO:0006873               |
| GO:0034404            |                      |                  |                              |                        |                 | GO:0055082               |
| GO:0055074            |                      |                  |                              |                        |                 | GO:0048878               |
| GO:0055065            |                      |                  |                              |                        |                 |                          |
| GO:0055066            |                      |                  |                              |                        |                 |                          |
| repeat:LRR 1          |                      |                  |                              |                        |                 |                          |
| repeat:LRR 2          |                      |                  |                              |                        |                 |                          |
| ID: leucine-rich      |                      |                  |                              |                        |                 |                          |
| GO:0031175            |                      |                  |                              |                        |                 |                          |
| GO:0048666            |                      |                  |                              |                        |                 |                          |
| GO:0030030            |                      |                  |                              |                        |                 |                          |
| GO:0006917            |                      |                  |                              |                        |                 |                          |
| GO:0012502            |                      |                  |                              |                        |                 |                          |
| GO:0043065            |                      |                  |                              |                        |                 |                          |
| GO:0043068            |                      |                  |                              |                        |                 |                          |
| GO:0010942            |                      |                  |                              |                        |                 |                          |
| ID: IPR007087         |                      |                  |                              |                        |                 |                          |
| GO:0051603            |                      |                  |                              |                        |                 |                          |
| GO:0044257            |                      |                  |                              |                        |                 |                          |
