# Supplementary material for: Integrated Epigenome Profiling of Repressive Histone Modifications, DNA Methylation and Gene Expression in Normal and Malignant Urothelial Cells
Source: PubMed Central journal article supplement (PMC3296741; doi:10.1371/journal.pone.0032750), 2012-03-07
Supplement: pone.0032750.s011.pdf [file pone.0032750.s011.pdf]

Supplementary table 4. Phenotype specific gene expression

| Gene ID   | Epigenetic Silencing | Epigenetic repressio | n  | Median expression (fluorescence) |               |            |            |            | T test difference in expression (p value shown) |                                   |           |          |          |             |             |             |
|-----------|----------------------|----------------------|----|----------------------------------|---------------|------------|------------|------------|-------------------------------------------------|-----------------------------------|-----------|----------|----------|-------------|-------------|-------------|
|           |                      |                      |    | Expression change in UCC         | median normal | median UCC | median NMI | median INV | median all UCC                                  | Difference between UCC and normal | N vs. CIS | N vs NMI | N vs INV | CIS vs. NMI | CIS vs. INV | NMI vs. INV |
| NM_004546 | 0                    | 1                    | -1 | 485.5                            | 1029.7        | 1299.0     | 1223.8     | 1110.2     | 624.7                                           | 0.801                             | 0.028     | 0.004    | 0.195    | 0.074       | 0.114       | 0.022       |
| NM_004894 | 0                    | 1                    | -1 | 508.2                            | 741.0         | 952.1      | 1105.3     | 1063.9     | 555.7                                           | 0.002                             | 0.996     | 0.459    | 0.002    | 0.008       | 0.476       | 0.926       |
| NM_007100 | 0                    | 1                    | -1 | 319.8                            | 553.6         | 866.7      | 695.1      | 764.2      | 444.4                                           | 0.819                             | 0.186     | 0.738    | 0.540    | 0.663       | 0.054       | 0.524       |
| NM_018935 | 0                    | 1                    | -1 | 4055.7                           | 4412.7        | 5026.9     | 3865.9     | 4472.2     | 416.5                                           | 0.049                             | 0.702     | 0.087    | 0.089    | 0.439       | 0.187       | 0.166       |
| NM_001316 | 0                    | 1                    | -1 | 115.5                            | 226.6         | 405.7      | 476.2      | 404.2      | 288.8                                           | 0.513                             | 0.132     | 0.030    | 0.077    | 0.029       | 0.040       | 0.122       |
| NM_004607 | 0                    | 1                    | -1 | 195.5                            | 364.7         | 459.4      | 422.6      | 444.5      | 249.1                                           | 0.055                             | 0.005     | 0.692    | 0.001    | 0.027       | 0.014       | 0.226       |
| NM_017866 | 0                    | 1                    | -1 | 113.0                            | 328.4         | 263.9      | 331.7      | 331.8      | 218.8                                           | 0.108                             | 0.003     | 0.040    | 0.011    | 0.017       | 0.123       | 0.059       |
| NM_003472 | 0                    | 1                    | -1 | 167.3                            | 241.3         | 229.7      | 450.7      | 382.0      | 214.7                                           | 0.411                             | 0.015     | 0.000    | 0.352    | 0.019       | 0.010       | 0.001       |
| NM_001316 | 0                    | 1                    | -1 | 78.4                             | 146.4         | 242.7      | 341.6      | 282.9      | 204.5                                           | 0.235                             | 0.024     | 0.071    | 0.001    | 0.003       | 0.475       | 0.054       |
| NM_004927 | 0                    | 1                    | -1 | 376.7                            | 384.2         | 564.2      | 601.4      | 559.7      | 183.0                                           | 0.986                             | 0.071     | 0.173    | 0.154    | 0.196       | 0.614       | 0.054       |
| NM_004546 | 0                    | 1                    | -1 | 165.3                            | 271.9         | 331.6      | 390.8      | 330.0      | 164.7                                           | 0.639                             | 0.001     | 0.000    | 0.007    | 0.000       | 0.079       | 0.000       |
| NM_001033 | 0                    | 1                    | -1 | 103.0                            | 220.9         | 216.5      | 308.3      | 247.8      | 144.8                                           | 0.473                             | 0.002     | 0.000    | 0.007    | 0.000       | 0.279       | 0.000       |
| NM_016647 | 0                    | 1                    | -1 | 203.0                            | 174.9         | 438.8      | 190.8      | 342.8      | 139.8                                           | 0.009                             | 0.062     | 0.000    | 0.868    | 0.009       | 0.158       | 0.001       |
| NM_007100 | 0                    | 1                    | -1 | 141.7                            | 202.5         | 296.8      | 232.8      | 278.1      | 136.5                                           | 0.005                             | 0.005     | 0.115    | 0.001    | 0.001       | 0.148       | 0.224       |
| NM_016359 | 0                    | 1                    | -1 | 72.7                             | 101.9         | 152.3      | 251.3      | 207.7      | 135.0                                           | 0.226                             | 0.120     | 0.002    | 0.678    | 0.627       | 0.135       | 0.005       |
| NM_014597 | 0                    | 1                    | -1 | 182.5                            | 267.2         | 264.9      | 347.6      | 315.9      | 133.4                                           | 0.022                             | 0.648     | 0.000    | 0.029    | 0.445       | 0.000       | 0.005       |
| NM_015878 | 0                    | 1                    | -1 | 62.8                             | 116.4         | 173.3      | 171.4      | 195.7      | 132.9                                           | 0.353                             | 0.341     | 0.095    | 0.809    | 0.010       | 0.015       | 0.854       |
| NM_006565 | 0                    | 1                    | -1 | 110.7                            | 133.4         | 219.5      | 259.1      | 240.8      | 130.1                                           | 0.569                             | 0.002     | 0.001    | 0.047    | 0.034       | 0.354       | 0.005       |
| NM_024844 | 0                    | 1                    | -1 | 80.1                             | 81.8          | 193.6      | 200.2      | 203.0      | 122.9                                           | 0.363                             | 0.023     | 0.973    | 0.216    | 0.366       | 0.026       | 0.110       |
| NM_004147 | 0                    | 1                    | -1 | 284.7                            | 288.7         | 405.7      | 401.9      | 401.9      | 117.5                                           | 0.043                             | 0.027     | 0.001    | 0.355    | 0.111       | 0.039       | 0.000       |
| NM_016001 | 0                    | 1                    | -1 | 57.6                             | 102.1         | 138.6      | 177.7      | 166.4      | 108.8                                           | 0.022                             | 0.116     | 0.013    | 0.046    | 0.019       | 0.174       | 0.099       |
| NM_003776 | 0                    | 1                    | -1 | 104.9                            | 114.9         | 252.3      | 222.1      | 201.7      | 96.8                                            | 0.002                             | 0.544     | 0.238    | 0.911    | 0.770       | 0.784       | 0.168       |
| NM_002296 | 0                    | 1                    | -1 | 137.4                            | 197.8         | 193.0      | 302.1      | 233.5      | 96.1                                            | 0.166                             | 0.215     | 0.358    | 0.970    | 0.193       | 0.194       | 0.804       |
| NM_004688 | 0                    | 1                    | -1 | 55.3                             | 97.6          | 130.6      | 171.3      | 148.6      | 93.3                                            | 0.069                             | 0.116     | 0.463    | 0.755    | 0.116       | 0.151       | 0.721       |
| NM_004894 | 0                    | 1                    | -1 | 118.3                            | 132.1         | 194.2      | 243.2      | 209.9      | 91.6                                            | 0.961                             | 0.000     | 0.000    | 0.015    | 0.013       | 0.835       | 0.000       |
| NM_001316 | 0                    | 1                    | -1 | 93.4                             | 150.9         | 137.9      | 185.3      | 178.4      | 84.9                                            | 0.178                             | 0.174     | 0.000    | 0.644    | 0.038       | 0.000       | 0.007       |
| NM_024629 | 0                    | 1                    | -1 | 43.2                             | 52.9          | 98.3       | 128.7      | 128.1      | 48.9                                            | 0.067                             | 0.602     | 0.797    | 0.005    | 0.025       | 0.529       | 0.735       |
| NM_004526 | 0                    | 1                    | -1 | 139.3                            | 169.0         | 166.5      | 250.8      | 222.2      | 82.9                                            | 0.310                             | 0.010     | 0.005    | 0.032    | 0.015       | 0.272       | 0.012       |
| NM_019005 | 0                    | 1                    | -1 | 102.5                            | 127.1         | 167.6      | 186.8      | 184.8      | 82.4                                            | 0.022                             | 0.000     | 0.000    | 0.080    | 0.052       | 0.801       | 0.001       |
| NM_018230 | 0                    | 1                    | -1 | 115.7                            | 159.0         | 173.7      | 184.4      | 191.7      | 76.0                                            | 0.108                             | 0.112     | 0.023    | 0.018    | 0.703       | 0.000       | 0.628       |
| NM_007358 | 0                    | 1                    | -1 | 107.5                            | 132.5         | 167.7      | 181.8      | 182.4      | 74.8                                            | 0.140                             | 0.025     | 0.015    | 0.029    | 0.024       | 0.606       | 0.114       |
| NM_016395 | 0                    | 1                    | -1 | 93.3                             | 87.8          | 146.8      | 130.2      | 165.3      | 72.0                                            | 0.837                             | 0.004     | 0.001    | 0.005    | 0.002       | 0.973       | 0.000       |
| NM_019005 | 0                    | 1                    | -1 | 109.4                            | 135.8         | 169.4      | 179.4      | 179.3      | 69.9                                            | 0.579                             | 0.000     | 0.432    | 0.001    | 0.492       | 0.150       | 0.984       |
| NM_019054 | 0                    | 1                    | -1 | 146.7                            | 188.1         | 166.8      | 211.9      | 215.9      | 69.2                                            | 0.418                             | 0.001     | 0.012    | 0.014    | 0.076       | 0.447       | 0.000       |
| NM_018307 | 0                    | 1                    | -1 | 100.9                            | 106.6         | 137.1      | 181.5      | 170.1      | 69.2                                            | 0.037                             | 0.001     | 0.002    | 0.000    | 0.000       | 0.258       | 0.002       |
| NM_002967 | 0                    | 1                    | -1 | 148.8                            | 117.0         | 232.4      | 220.9      | 211.5      | 62.7                                            | 0.168                             | 0.001     | 0.001    | 0.000    | 0.000       | 0.247       | 0.000       |
| NM_018120 | 0                    | 1                    | -1 | 50.9                             | 61.6          | 95.7       | 116.8      | 113.4      | 62.5                                            | 0.036                             | 0.019     | 0.001    | 0.964    | 0.115       | 0.116       | 0.000       |
| NM_007358 | 0                    | 1                    | -1 | 73.2                             | 122.6         | 134.4      | 128.0      | 134.5      | 61.3                                            | 0.372                             | 0.000     | 0.426    | 0.116    | 0.499       | 0.001       | 0.453       |
| NM_004146 | 0                    | 1                    | -1 | 43.1                             | 26.2          | 109.8      | 109.1      | 101.2      | 58.1                                            | 0.084                             | 0.180     | 0.521    | 0.001    | 0.006       | 0.287       | 0.521       |
| NM_001033 | 0                    | 1                    | -1 | 72.7                             | 72.5          | 106.8      | 113.2      | 120.3      | 47.6                                            | 0.057                             | 0.001     | 0.005    | 0.000    | 0.000       | 0.959       | 0.004       |
| NM_003707 | 0                    | 1                    | -1 | 92.9                             | 102.1         | 128.2      | 165.3      | 137.9      | 45.0                                            | 0.116                             | 0.477     | 0.039    | 0.389    | 0.239       | 0.115       | 0.102       |
| NM_005675 | 0                    | 1                    | -1 | 122.2                            | 82.4          | 170.1      | 171.7      | 163.8      | 41.7                                            | 0.737                             | 0.952     | 0.015    | 0.777    | 0.067       | 0.018       | 0.082       |
| NM_024056 | 0                    | 1                    | -1 | 287.8                            | 249.4         | 324.3      | 360.5      | 326.9      | 39.1                                            | 0.327                             | 0.128     | 0.083    | 0.875    | 0.768       | 0.005       | 0.075       |
| NM_017615 | 0                    | 1                    | -1 | 43.8                             | 58.1          | 80.3       | 83.4       | 82.1       | 38.3                                            | 0.644                             | 0.130     | 0.000    | 0.499    | 0.009       | 0.000       | 0.004       |
| NM_017917 | 0                    | 1                    | -1 | 45.7                             | 71.6          | 67.7       | 85.2       | 83.4       | 37.7                                            | 0.960                             | 0.270     | 0.020    | 0.550    | 0.135       | 0.195       | 0.031       |
| NM_001634 | 0                    | 1                    | -1 | 60.5                             | 88.9          | 68.4       | 99.1       | 93.4       | 32.9                                            | 0.404                             | 0.343     | 0.114    | 0.737    | 0.821       | 0.310       | 0.162       |
| NM_001634 | 0                    | 1                    | -1 | 59.6                             | 98.3          | 59.9       | 101.0      | 90.5       | 30.9                                            | 0.372                             | 0.001     | 0.000    | 0.035    | 0.001       | 0.030       | 0.000       |
| NM_003563 | 0                    | 1                    | -1 | 85.1                             | 67.6          | 93.9       | 114.9      | 114.7      | 29.5                                            | 0.310                             | 0.050     | 0.104    | 0.000    | 0.001       | 0.517       | 0.142       |
| NM_003171 | 0                    | 1                    | -1 | 77.6                             | 102.1         | 94.5       | 112.5      | 106.7      | 29.1                                            | 0.189                             | 0.390     | 0.154    | 0.029    | 0.032       | 0.308       | 0.265       |
| NM_017768 | 0                    | 1                    | -1 | 36.8                             | 45.5          | 51.6       | 68.0       | 64.3       | 27.4                                            | 0.037                             | 0.067     | 0.018    | 0.785    | 0.094       | 0.150       | 0.001       |
| NM_016103 | 0                    | 1                    | -1 | 18.6                             | 42.3          | 33.1       | 46.0       | 45.9       | 27.2                                            | 0.039                             | 0.001     | 0.000    | 0.000    | 0.000       | 0.941       | 0.000       |
| NM_003563 | 0                    | 1                    | -1 | 152.5                            | 150.4         | 152.7      | 179.0      | 179.6      | 27.1                                            | 0.612                             | 0.001     | 0.000    | 0.001    | 0.001       | 0.317       | 0.000       |
| NM_031209 | 0                    | 1                    | -1 | 129.1                            | 87.4          | 182.9      | 141.8      | 154.7      | 25.6                                            | 0.306                             | 0.899     | 0.729    | 0.389    | 0.374       | 0.856       | 0.694       |
| NM_003876 | 0                    | 1                    | -1 | 158.9                            | 151.3         | 183.9      | 203.2      | 182.7      | 23.8                                            | 0.243                             | 0.071     | 0.009    | 0.212    | 0.019       | 0.143       | 0.002       |
| NM_018147 | 0                    | 1                    | -1 | 20.7                             | 27.9          | 35.7       | 43.0       | 43.4       | 22.7                                            | 0.940                             | 0.016     | 0.025    | 0.043    | 0.063       | 0.674       | 0.034       |
| NM_003878 | 0                    | 1                    | -1 | 35.0                             | 49.4          | 38.8       | 69.1       | 57.1       | 22.2                                            | 0.832                             | 0.014     | 0.003    | 0.064    | 0.026       | 0.413       | 0.012       |
| NM_003201 | 0                    | 1                    | -1 | 82.3                             | 78.4          | 111.0      | 108.2      | 103.1      | 20.8                                            | 0.167                             | 0.308     | 0.009    | 0.452    | 0.334       | 0.010       | 0.060       |
| NM_014388 | 0                    | 1                    | -1 | 57.2                             | 74.2          | 74.5       | 74.8       | 76.9       | 17.7                                            | 0.891                             | 0.000     | 0.000    | 0.048    | 0.070       | 0.705       | 0.000       |
| NM_014388 | 0                    | 1                    | -1 | 75.7                             | 86.0          | 109.9      | 92.7       | 95.2       | 19.5                                            | 0.328                             | 0.002     | 0.000    | 0.011    | 0.000       | 0.006       | 0.000       |
| NM_003201 | 0                    | 1                    | -1 | 40.1                             | 30.7          | 59.8       | 60.5       | 59.1       | 19.0                                            | 0.807                             | 0.003     | 0.000    | 0.058    | 0.028       | 0.314       | 0.003       |
| NM_002914 | 0                    | 1                    | -1 | 53.3                             | 57.1          | 74.2       | 63.7       | 72.1       | 18.8                                            | 0.451                             | 0.006     | 0.000    | 0.001    | 0.000       | 0.160       | 0.002       |
| NM_016359 | 0                    | 1                    | -1 | 48.0                             | 56.4          | 53.7       | 67.3       | 64.8       | 16.8                                            | 0.281                             | 0.000     | 0.000    | 0.000    | 0.000       | 0.586       | 0.001       |
| NM_017865 | 0                    | 1                    | -1 | 182.1                            | 142.1         | 275.1      | 193.2      | 198.6      | 16.4                                            | 0.222                             | 0.146     | 0.749    | 0.054    | 0.192       | 0.474       | 0.576       |
| NM_020662 | 0                    | 1                    | -1 | 12.4                             | 13.9          | 24.6       | 32.5       | 28.8       | 16.4                                            | 0.005                             | 0.001     | 0.009    | 0.000    | 0.000       | 0.825       | 0.004       |
| NM_002967 | 0                    | 1                    | -1 | 22.2                             | 17.6          | 38.5       | 45.8       | 45.1       | 16.0                                            | 0.511                             | 0.005     | 0.003    | 0.002    | 0.002       | 0.762       | 0.008       |
| NM_002691 | 0                    | 1                    | -1 | 49.7                             | 50.3          | 65.4       | 69.9       | 64.7       | 15.1                                            | 0.674                             | 0.003     | 0.002    | 0.003    | 0.001       | 0.475       | 0.005       |
| NM_001809 | 0                    | 1                    | -1 | 30.6                             | 44.3          | 32.7       | 62.1       | 44.4       | 13.8                                            | 0.351                             | 0.001     | 0.010    | 0.047    | 0.166       | 0.229       | 0.005       |
| NM_001277 | 0                    | 1                    | -1 | 80.5                             | 89.1          | 85.1       | 78.3       | 92.1       | 11.5                                            | 0.441                             | 0.003     | 0.016    | 0.082    | 0.208       | 0.420       | 0.007       |
| NM_018133 | 0                    | 1                    | -1 | 40.8                             | 42.4          | 40.6       | 57.3       | 51.7       | 10.9                                            | 0.385                             | 0.012     | 0.007    | 0.009    | 0.007       | 0.590       | 0.010       |
| NM_018492 | 0                    | 1                    | -1 | 18.4                             | 20.2          | 24.2       | 33.8       | 29.1       | 10.6                                            | 0.047                             | 0.001     | 0.001    | 0.084    | 0.095       | 0.821       | 0.000       |
| NM_003258 | 0                    | 1                    | -1 | 86.3                             | 79.6          | 79.5       | 117.7      | 95.9       | 9.7                                             | 0.723                             | 0.086     | 0.018    | 0.121    | 0.026       | 0.167       | 0.048       |
| NM_018944 | 0                    | 1                    | -1 | 75.4                             | 68.8          | 79.8       | 83.6       | 84.3       | 9.0                                             | 0.843                             | 0.132     | 0.657    | 0.110    | 0.726       | 0.295       | 0.883       |
| NM_024631 | 0                    | 1                    | -1 | 37.5                             | 36.3          | 49.5       | 41.8       | 45.1       | 7.6                                             | 0.232                             | 0.000     | 0.330    | 0.012    | 0.599       | 0.085       | 0.854       |
| NM_017615 | 0                    | 1                    | -1 | 119.2                            | 100.0         | 124.4      | 113.1      | 126.6      | 7.3                                             | 0.129                             | 0.592     | 0.519    | 0.086    |             |             |             |
